# Supplementary material
Source: Research Square preprint supplement (doi:10.21203/rs.3.rs-10216609/v1)

**Supplemetary Materials**

**Table S1**

*Descriptive statistics (mean, standard deviation, skewness, kurtosis and range)*

| Item | M | SD | Skewness | Kurtosis | Range |
| --- | --- | --- | --- | --- | --- |
| *Anhedonia (1)* | 4.98 | 2.627 | .136 | -1.097 | 9 |
| *DepressedMood (2)* | 4.48 | 2.788 | .350 | -1.093 | 9 |
| *Anxiety (3)* | 4.58 | 2.751 | .310 | -1.097 | 9 |
| *Worrying (4)* | 4.31 | 2.825 | .413 | -1.070 | 9 |
| *EsportsStress (5)* | 3.82 | 2.716 | .707 | -.662 | 9 |
| *GamePreoccupation (6)* | 4.75 | 2.894 | .231 | -1.195 | 9 |
| *SleepQuantity (7)* | 5.52 | 2.933 | -.032 | -1.259 | 9 |
| *SleepQuality (8)* | 5.40 | 3.020 | .023 | -1.326 | 9 |
| *PhysicalFatigue (9)* | 4.96 | 2.655 | .155 | -1.075 | 9 |
| *MentalFatigue (10)* | 5.53 | 2.702 | -.116 | -1.092 | 9 |
| *Pain (11)* | 3.67 | 2.779 | .718 | -.763 | 9 |
| *LackSupportEsports (12)* | 3.61 | 2.945 | .769 | -.780 | 9 |
| *LackSupportPersonal (13)* | 4.24 | 3.035 | .436 | -1.230 | 9 |
| *LackEmotionControl (14)* | 4.24 | 2.781 | .484 | -.968 | 9 |
| *LackAutonomy (15)* | 3.60 | 2.817 | .741 | -.793 | 9 |
| *LackSkill (16)* | 5.68 | 2.823 | -.179 | -1.113 | 9 |
| *LackConnection (17)* | 4.45 | 3.179 | .379 | -1.289 | 9 |

**Table S2**

*Pearson zero-order correlations between the variables*

|  | *1* | *2* | *3* | *4* | *5* | *6* | *7* | *8* | *9* | *10* | *11* | *12* | *13* | *14* | *15* | *16* |
| --- | --- | --- | --- | --- | --- | --- | --- | --- | --- | --- | --- | --- | --- | --- | --- | --- |
| *1* | - | - | - | - | - | - | - | - | - | - | - | - | - | - | - | - |
| *2* | .635 | - | - | - | - | - | - | - | - | - | - | - | - | - | - | - |
| *3* | .513 | .657 | - | - | - | - | - | - | - | - | - | - | - | - | - | - |
| *4* | .514 | .633 | .661 | - | - | - | - | - | - | - | - | - | - | - | - | - |
| *5* | .351 | .413 | .413 | .414 | - | - | - | - | - | - | - | - | - | - | - | - |
| *6* | .330 | .360 | .341 | .326 | .391 | - | - | - | - | - | - | - | - | - | - | - |
| *7* | .332 | .385 | .378 | .353 | .239 | .306 | - | - | - | - | - | - | - | - | - | - |
| *8* | .422 | .444 | .465 | .417 | .281 | .294 | .701 | - | - | - | - | - | - | - | - | - |
| *9* | .462 | .534 | .496 | .493 | .340 | .350 | .565 | .610 | - | - | - | - | - | - | - | - |
| *10* | .509 | .621 | .570 | .522 | .355 | .310 | .510 | .517 | .617 | - | - | - | - | - | - | - |
| *11* | .382 | .457 | .490 | .462 | .399 | .302 | .319 | .367 | .500 | .405 | - | - | - | - | - | - |
| *12* | .285 | .334 | .338 | .343 | .498 | .334 | .184 | .204 | .262 | .275 | .368 | - | - | - | - | - |
| *13* | .427 | .481 | .423 | .433 | .381 | .334 | .297 | .327 | .350 | .386 | .384 | .495 | - | - | - | - |
| *14* | .461 | .529 | .538 | .465 | .439 | .375 | .344 | .350 | .387 | .431 | .421 | .398 | .453 | - | - | - |
| *15* | .380 | .419 | .394 | .383 | .547 | .412 | .272 | .276 | .326 | .309 | .423 | .550 | .462 | .501 | - | - |
| *16* | .315 | .362 | .356 | .321 | .322 | .309 | .325 | .325 | .384 | .411 | .295 | .263 | .316 | .393 | .327 | - |
| *17* | .383 | .397 | .380 | .355 | .358 | .332 | .285 | .299 | .327 | .346 | .390 | .397 | .387 | .414 | .444 | .403 |

*Note. All correlations were significant at the 0.01 level.*

**Table S3**

*Relative Importance Network RawOutStrength (i.e.,* *sum of the weights of outgoing edges based on raw lmg/R² contributions)*

| Node | RawOutStrength | Node | RawOutStrength |
| --- | --- | --- | --- |
| DepressedMood | 0.6892 | Anhedonia | 0.4557 |
| Anxiety | 0.6162 | EsportsStress | 0.4144 |
| PhysicalFatigue | 0.5969 | LackSupportEsports | 0.4141 |
| SleepQuality | 0.5841 | LackSupportPersonal | 0.4012 |
| MentalFatigue | 0.5712 | Pain | 0.3841 |
| Worrying | 0.5369 | LackConnection | 0.3388 |
| SleepQuantity | 0.5149 | LackSkill | 0.2739 |
| LackAutonomy | 0.5118 | GamePreoccupation | 0.2624 |
| LackEmotionControl | 0.4668 |  |  |

**Table S4**

*Directed Acyclic Graph predictability (i.e., adjusted R²;* *proportion of variance in a node explained by its parents)*

| Node | AdjR² | Node | AdjR² |
| --- | --- | --- | --- |
| SleepQuality | 0.5742 | LackSupportPersonal | 0.3556 |
| Worrying | 0.5048 | LackEmotionControl | 0.3427 |
| Anxiety | 0.4311 | EsportsStress | 0.2985 |
| MentalFatigue | 0.4306 | LackSkill | 0.2695 |
| Anhedonia | 0.4031 | LackConnection | 0.2664 |
| PhysicalFatigue | 0.3805 | LackAutonomy | 0.2503 |
| Pain | 0.3677 | GamePreoccupation | 0.2076 |
| SleepQuantity | 0.3600 | DepressedMood | 0.0000 |
| LackSupportEsports | 0.3564 |  |  |

**Table S5**

*Bayesian Gaussian Graphical Copula Model partial correlations (i.e., conditional dependencies)*

| From | To | Strength | From | To | Strength |
| --- | --- | --- | --- | --- | --- |
| SleepQuantity | SleepQuality | 0.4846 | Depressed Mood | LackSupport Personal | 0.1669 |
| Anhedonia | Depressed Mood | 0.3406 | MentalFatigue | LackSkill | 0.1509 |
| Anxiety | Woryying | 0.3104 | Anxiety | Pain | 0.1504 |
| LackSupport Esports | LackSupport Personal | 0.3025 | LackEmotion Control | LackSkill | 0.1439 |
| LackSupport Esports | Lack Autonomy | 0.2819 | LackSupport Personal | LackEmotion Control | 0.1396 |
| Physical Fatigue | MentalFatigue | 0.2784 | Game Preoccupation | Lack Autonomy | 0.1365 |
| Depressed Mood | MentalFatigue | 0.2623 | EsportsStress | Game Preoccupation | 0.1273 |
| EsportsStress | Lack Autonomy | 0.2496 | Pain | Lack Connection | 0.1246 |
| Physical Fatigue | Pain | 0.2401 | SleepQuantity | MentalFatigue | 0.1178 |
| Depressed Mood | Worrying | 0.2332 | Worrying | EsportsStress | 0.1111 |
| SleepQuality | Physical Fatigue | 0.2328 | SleepQuantity | Physical Fatigue | 0.1107 |
| EsportsStress | LackSupport Esports | 0.2327 | Anxiety | MentalFatigue | 0.1068 |
| LackSkill | Lack Connection | 0.2151 | Anhedonia | Lack Connection | 0.1068 |
| LackEmotion Control | Lack Autonomy | 0.2134 | Anhedonia | LackEmotion Control | 0.0973 |
| Anxiety | LackEmotion Control | 0.1994 | Worrying | Physical Fatigue | 0.0939 |
| Lack Autonomy | Lack Connection | 0.1871 | Anhedonia | SleepQuality | 0.0851 |
| Depressed Mood | Anxiety | 0.1805 | Anxiety | SleepQuality | 0.0735 |

**Table S6**

*Directed Acyclic Graph edge-level arc.strength scores (i.e., the change in score when arc is removed, based on their BIC-g score)*

| From | To | BIC-g | From | To | BIC-g |
| --- | --- | --- | --- | --- | --- |
| Depressed Mood | Anxiety | -286.1222 | EsportsStress | LackSupport Esports | -39.1168 |
| Depressed Mood | Anhedonia | -261.4783 | Depressed Mood | LackEmotion Control | -37.1618 |
| MentalFatigue | Physical Fatigue | -242.4665 | Anxiety | Mental Fatigue | -36.2857 |
| Lack Autonomy | EsportsStress | -178.6969 | Lack Autonomy | Game Preoccupation | -31.7089 |
| SleepQuantity | SleepQuality | -168.1569 | Anxiety | Pain | -31.0572 |
| LackEmotion Control | Lack Autonomy | -144.6639 | Lack Autonomy | Pain | -29.3295 |
| Anxiety | Worrying | -95.7986 | Mental Fatigue | Sleep Quantity | -29.0749 |
| LackSupport Esports | LackSupport Personal | -88.1268 | Mental Fatigue | LackSkill | -28.9347 |
| Depressed Mood | MentalFatigue | -85.1812 | Lack Connection | LackSkill | -27.6299 |
| Depressed Mood | LackSupport Personal | -78.8811 | Lack Autonomy | Lack Connection | -24.8625 |
| Lack Autonomy | LackSupport Esports | -77.2598 | Pain | Lack Connection | -22.2313 |
| Physical Fatigue | SleepQuantity | -71.9590 | EsportsStress | Game Preoccupation | -21.2582 |
| Depressed Mood | Worrying | -63.8263 | Anxiety | SleepQuality | -16.2709 |
| Physical Fatigue | Pain | -48.3029 | LackEmotionControl | LackSkill | -14.4021 |
| Anxiety | LackEmotion Control | -44.2507 | LackSupport Esports | Lack Connection | -11.2569 |
| Physical Fatigue | SleepQuality | -39.4228 |  |  |  |

**Table S7**

*Directed Acyclic Graph edge-level directional probabilities (i.e., the proportion of bootstrapped networks wherein the edge pointed from node A to node B)*

| From | To | Direction | From | To | Direction |
| --- | --- | --- | --- | --- | --- |
| MentalFatigue | LackSkill | 0.9727 | Lack Autonomy | LackSupport Esports | 0.6803 |
| LackEmotion Control | LackSkill | 0.9324 | Anxiety | SleepQuality | 0.6707 |
| Lack Autonomy | Game Preoccupation | 0.9287 | Lack Autonomy | EsportsStress | 0.6703 |
| Depressed Mood | LackSupport Personal | 0.8978 | Depressed Mood | Worrying | 0.6557 |
| Lack Autonomy | Lack Connection | 0.8864 | MentalFatigue | Sleep Quantity | 0.6513 |
| Anxiety | Pain | 0.8771 | Anxiety | Worrying | 0.6459 |
| Depressed Mood | Anhedonia | 0.8589 | Physical Fatigue | Sleep Quantity | 0.6408 |
| EsportsStress | Game Preoccupation | 0.8479 | Sleep Quantity | SleepQuality | 0.6388 |
| Depressed Mood | LackEmotion Control | 0.8131 | Lack Autonomy | Pain | 0.6250 |
| Anxiety | LackEmotion Control | 0.8002 | MentalFatigue | Physical Fatigue | 0.6141 |
| Physical Fatigue | Pain | 0.7927 | Depressed Mood | MentalFatigue | 0.5748 |
| Pain | Lack Connection | 0.7429 | EsportsStress | LackSupport Esports | 0.5672 |
| LackSupport Esports | Lack Connection | 0.7189 | Depressed Mood | Anxiety | 0.5466 |
| Physical Fatigue | SleepQuality | 0.7058 | Anxiety | MentalFatigue | 0.5271 |
| LackEmotion Control | Lack Autonomy | 0.6944 | Lack Connection | LackSkill | 0.5172 |
| LackSupport Esports | LackSupport Personal | 0.6820 |  |  |  |

**Table S8**

*Bayesian Gaussian Graphical Copula Model expected influence* *(i.e., sum of absolute node level partial correlations)*

| Node | Expected Influence | Node | Expected Influence |
| --- | --- | --- | --- |
| DepressedMood | 1.1835 | EsportsStress | 0.7208 |
| LackAutonomy | 1.0685 | SleepQuantity | 0.7131 |
| Anxiety | 1.0209 | LackConnection | 0.6336 |
| PhysicalFatigue | 0.9558 | Anhedonia | 0.6298 |
| MentalFatigue | 0.9161 | LackSupportPersonal | 0.6089 |
| SleepQuality | 0.8759 | Pain | 0.5151 |
| LackSupportEsports | 0.8171 | LackSkill | 0.5099 |
| LackEmotionControl | 0.7935 | GamePreoccupation | 0.2638 |
| Worrying | 0.7487 |  |  |

**Table S9**

*Bayesian Gaussian Graphical Copula Model degree (i.e., number of connections of a node)*

| Node | Degree | Node | Degree |
| --- | --- | --- | --- |
| Anxiety | 6 | SleepQuality | 4 |
| DepressedMood | 5 | Worrying | 4 |
| LackAutonomy | 5 | LackSkill | 3 |
| LackEmotionControl | 5 | LackSupportEsport | 3 |
| MentalFatigue | 5 | LackSupportPersonal | 3 |
| PhysicalFatigue | 5 | Pain | 3 |
| Anhedonia | 4 | SleepQuantity | 3 |
| EsportsStress | 4 | GamePreoccupation | 2 |
| LackConnection | 4 |  |  |

**Table S10**

*Bayesian Gaussian Graphical Copula Model betweenness (i.e., frequency with which a node lies on shortest paths between others)*

| Node | Betweenness | Node | Betweenness |
| --- | --- | --- | --- |
| LackAutonomy | 0.1417 | Anhedonia | 0.0666 |
| LackEmotionControl | 0.1322 | LackSupportPersonal | 0.0454 |
| Worrying | 0.1298 | SleepQuality | 0.0385 |
| Anxiety | 0.1223 | LackSkill | 0.0336 |
| DepressedMood | 0.1035 | Pain | 0.0323 |
| LackConnection | 0.0967 | LackSupportEsports | 0.0211 |
| EsportsStress | 0.0937 | SleepQuantity | 0.0042 |
| MentalFatigue | 0.0878 | GamePreoccupation | 0.0000 |
| PhysicalFatigue | 0.0838 |  |  |

**Table S11**

*Bayesian Gaussian Graphical Copula Model eigenvector (i.e., connection to other important nodes)*

| Node | Eigenvector | Node | Eigenvector |
| --- | --- | --- | --- |
| Anxiety | 1.000 | Pain | 0.5262 |
| MentalFatigue | 0.8411 | LackConnection | 0.4956 |
| DepressedMood | 0.8396 | LackAutonomy | 0.4923 |
| PhysicalFatigue | 0.7640 | LackSkill | 0.4758 |
| LackEmotionControl | 0.7065 | LackSupportPersonal | 0.4316 |
| Worrying | 0.6988 | EsportsStress | 0.3972 |
| SleepQuality | 0.6825 | LackSupportEsports | 0.3076 |
| Anhedonia | 0.6343 | GamePreoccupation | 0.2071 |
| SleepQuantity | 0.5327 |  |  |

**Table S12**

*Directed Acyclic Graph betweenness (i.e., frequency with which a node lies on shortest paths between others, normalized)*

| Node | Betweenness | Node | Betweenness |
| --- | --- | --- | --- |
| LackAutonomy | 0.0563 | Anhedonia | 0.0000 |
| LackEmotionControl | 0.0438 | DepressedMood | 0.0000 |
| LackSupportEsports | 0.0250 | EsportsStress | 0.0000 |
| LackConnection | 0.0208 | GamePreoccupation | 0.0000 |
| MentalFatigue | 0.0208 | LackSkill | 0.0000 |
| Pain | 0.0178 | LackSupportPersonal | 0.0000 |
| Anxiety | 0.0104 | SleepQuality | 0.0000 |
| PhysicalFatigue | 0.0104 | Worrying | 0.0000 |
| SleepQuantity | 0.0021 |  |  |

**Table S13**

*Directed Acyclic Graph InExpectedInfluence (i.e., sum of incoming edge weights to a node based on BIC score)*

| Node | InExpected Influence | Node | InExpected Influence |
| --- | --- | --- | --- |
| Anxiety | -286.1222 | LackSupportEsports | -116.3766 |
| Anhedonia | -261.4783 | Pain | -108.6896 |
| PhysicalFatigue | -242.4665 | SleepQuantity | -101.0339 |
| SleepQuality | -223.8506 | LackEmotionControl | -81.4124 |
| EsportsStress | -178.6969 | LackSkill | -70.9668 |
| LackSupportPersonal | -167.0079 | LackConnection | -58.3508 |
| Worrying | -159.6249 | GamePreoccupation | -52.9670 |
| LackAutonomy | -144.6639 | DepressedMood | 0.00000 |
| MentalFatigue | -121.4669 |  |  |

**Table S14**

*Directed Acyclic Graph OutExpectedInfluence (i.e., sum of outgoing edge weights from a node based on BIC score)*

| Node | OutExpected Influence | Node | OutExpected Influence |
| --- | --- | --- | --- |
| DepressedMood | -812.6509 | LackConnection | -27.6299 |
| LackAutonomy | -341.8577 | Pain | -22.2313 |
| MentalFatigue | -300.4760 | Anhedonia | 0.00000 |
| Anxiety | -223.6631 | GamePreoccupation | 0.00000 |
| SleepQuantity | -168.1569 | LackSkill | 0.00000 |
| PhysicalFatigue | -159.6847 | LackSupportPersonal | 0.00000 |
| LackEmotion Control | -159.0659 | SleepQuality | 0.00000 |
| LackSupportEsports | -99.3837 | Worrying | 0.00000 |
| EsportsStress | -60.3749 |  |  |

*
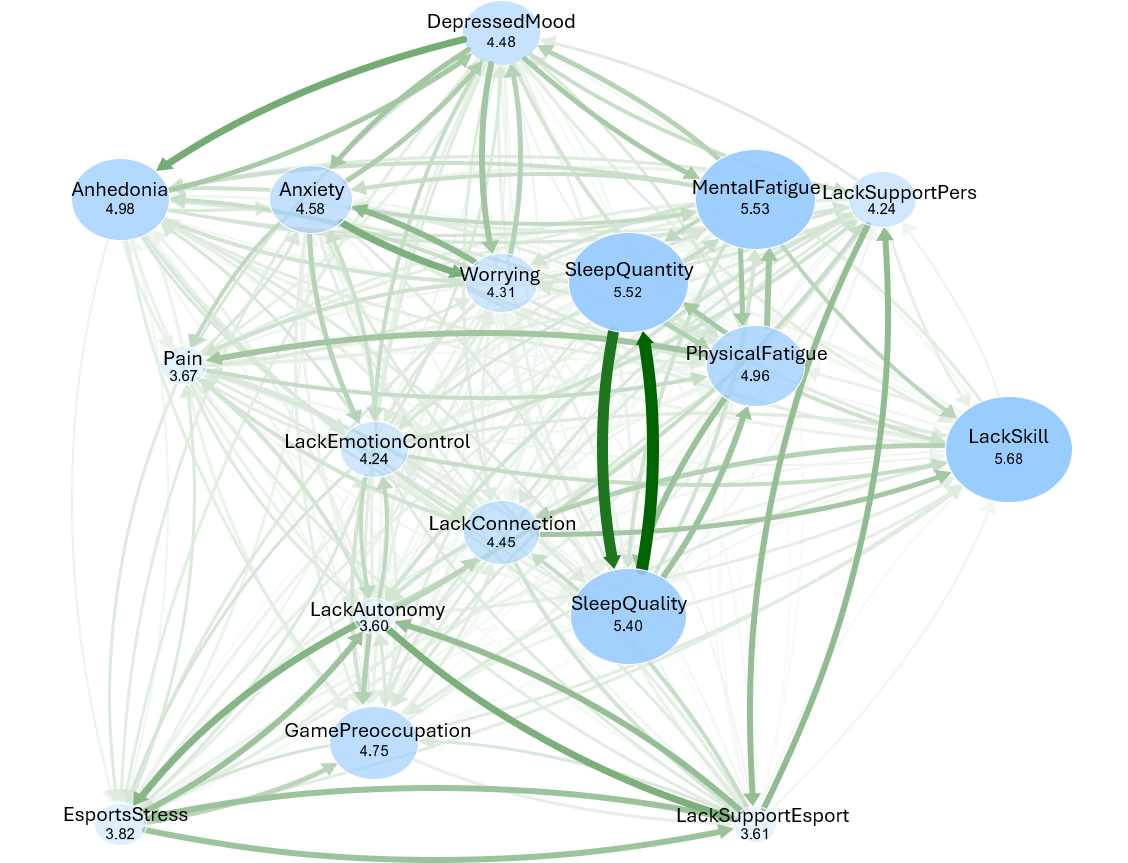
***Supplementary Figure 1***Relative Importance Network, edge width based on normalized lmg value*

**Supplementary Figure 2**

*Bayesian Gaussian Graphical Copula model with edge labels representing partial correlations*

*
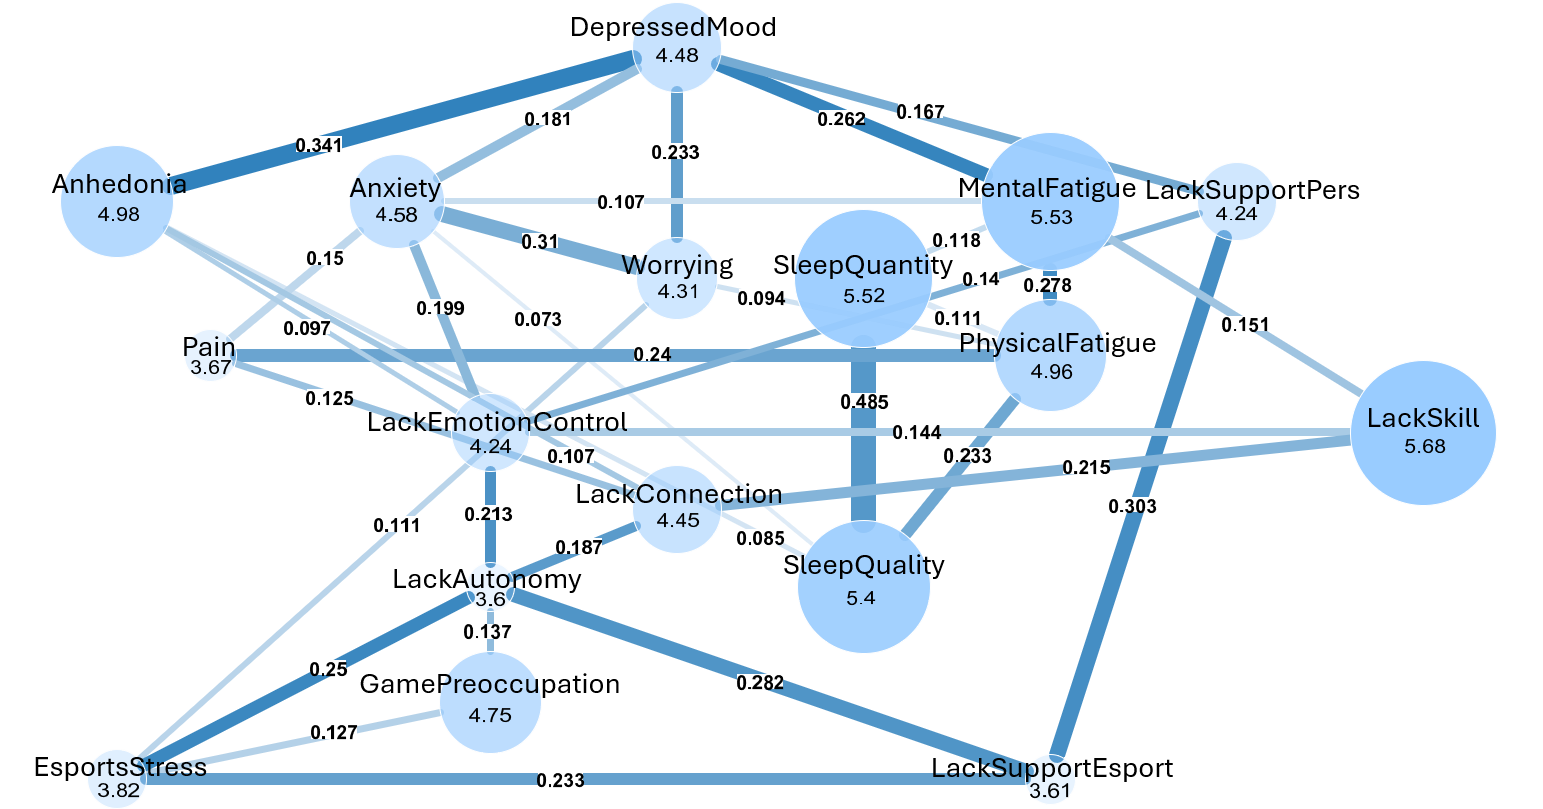
*

**Supplementary Figure 3**

*Directed Acyclic Graph of the GG custom questionnaire data – based on edge strength (BIC-g scores as edge labels)*


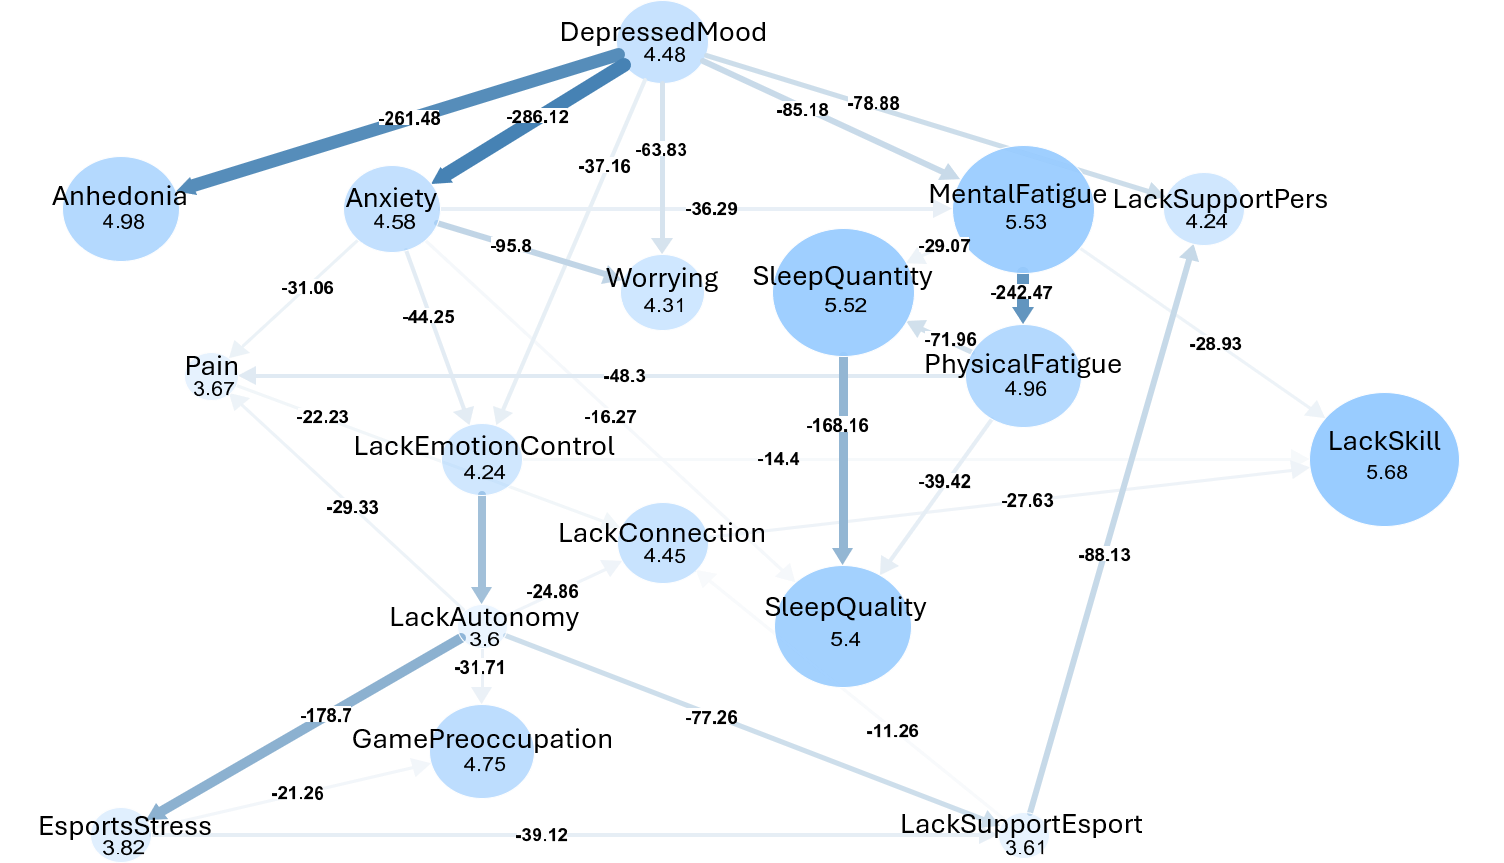


**Supplementary Figure 4**

*Directed Acyclic Graph of the GG custom questionnaire data – based on direction (directional probabilities as edge labels)*


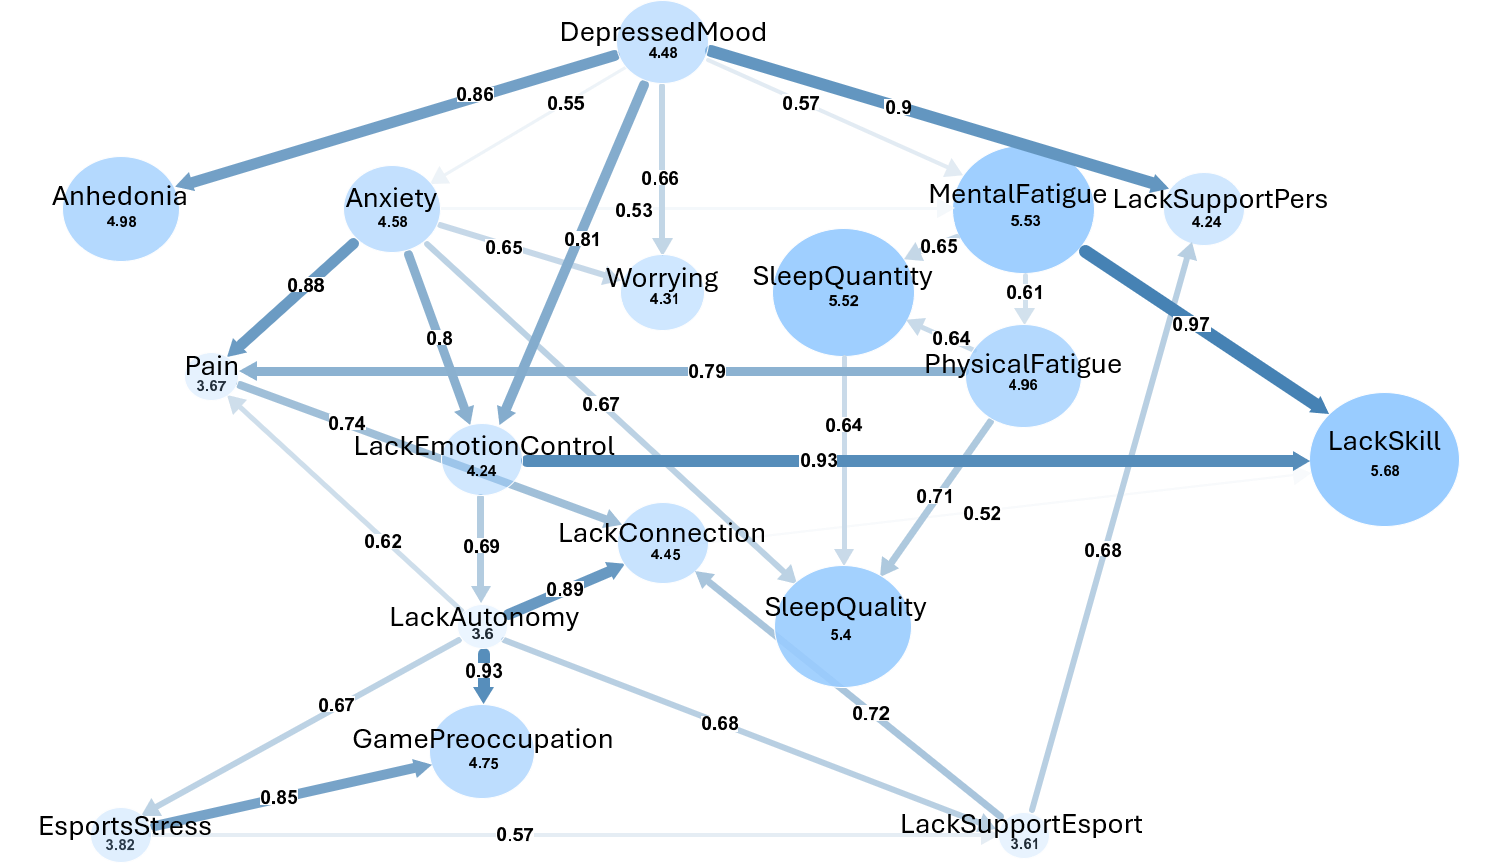

Supplement: Supplementary file 1 [file 0b73f44a3f7d9eeeacf852df.docx]
